# Supplementary material for: Single‐trial log transformation is optimal in frequency analysis of resting EEG alpha
Source: PubMed Central journal article supplement (PMC6221126; doi:10.1111/ejn.13854), 2018-02-19

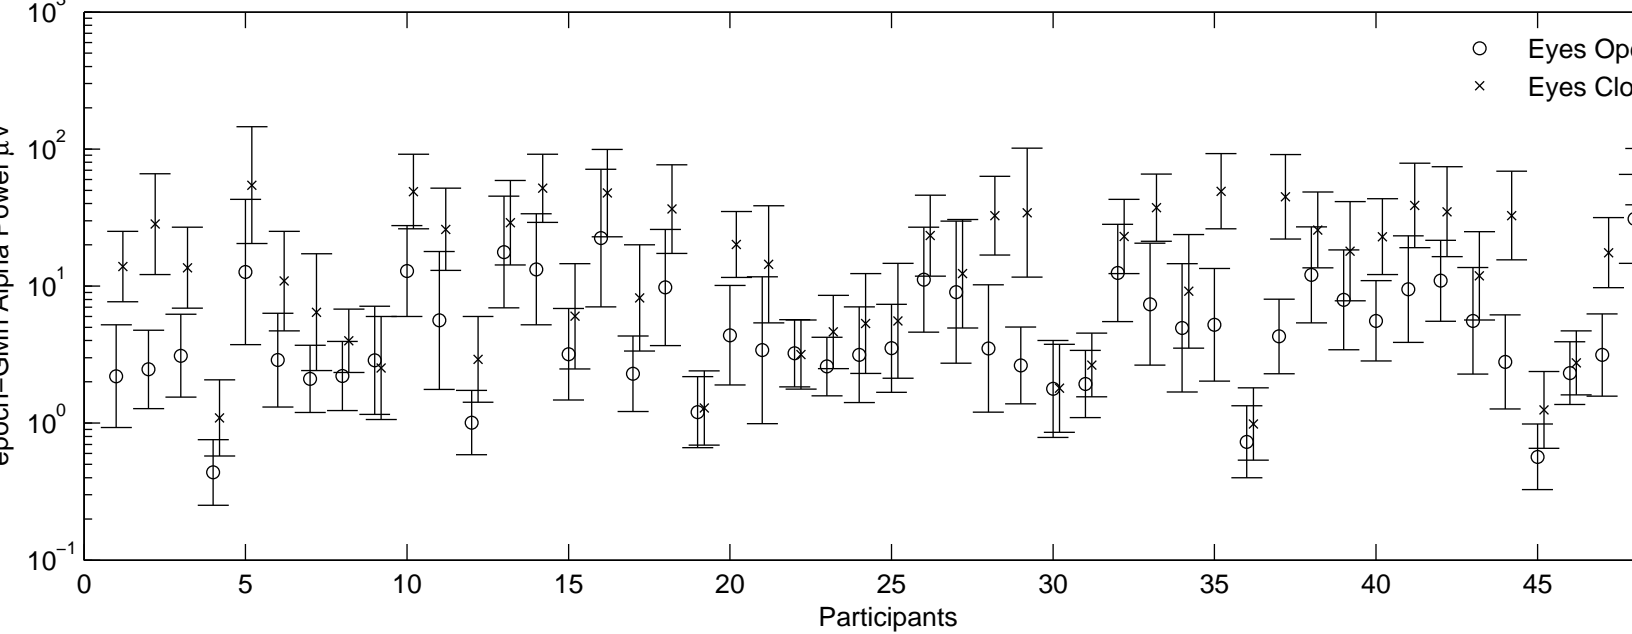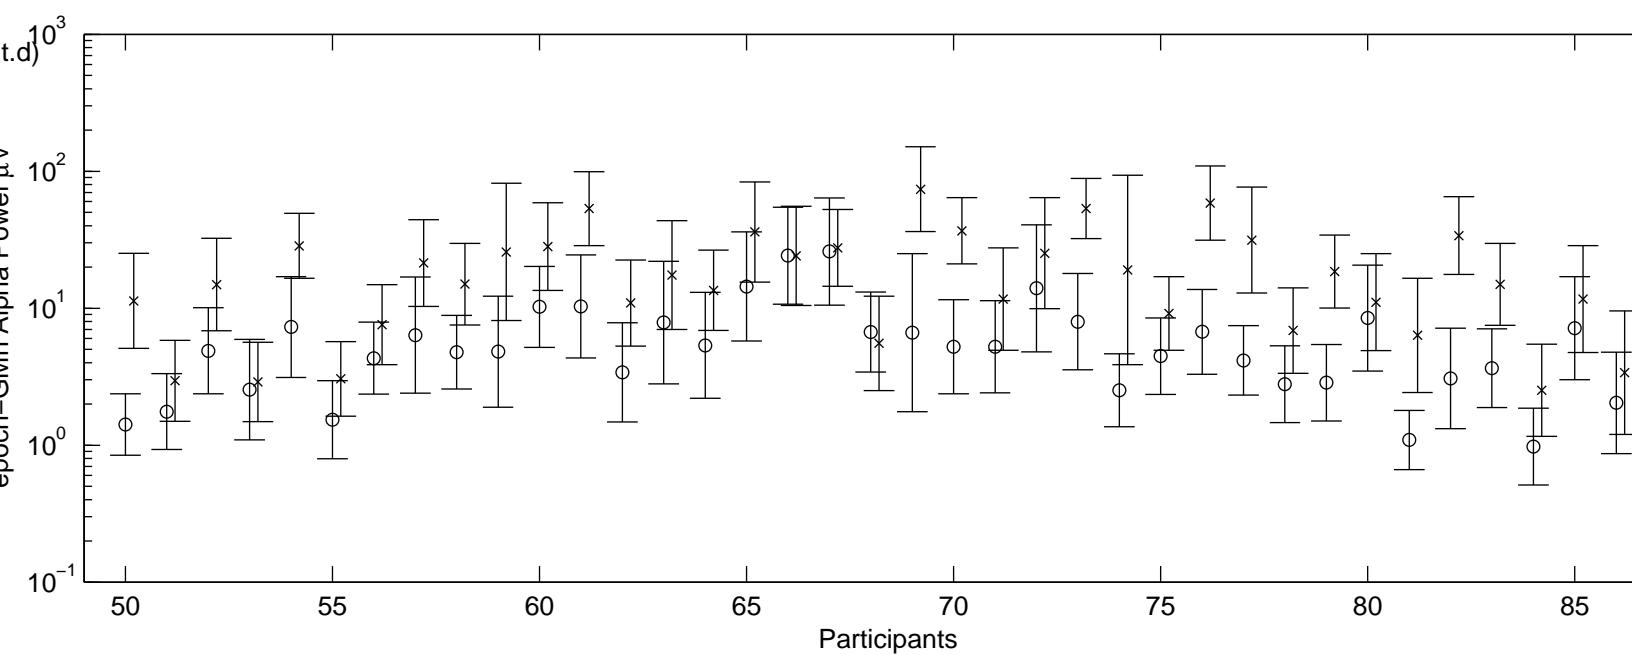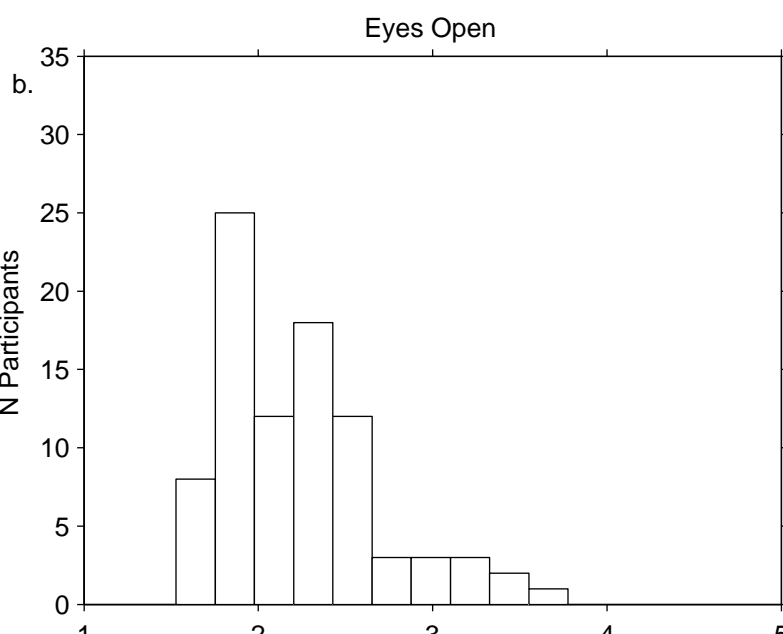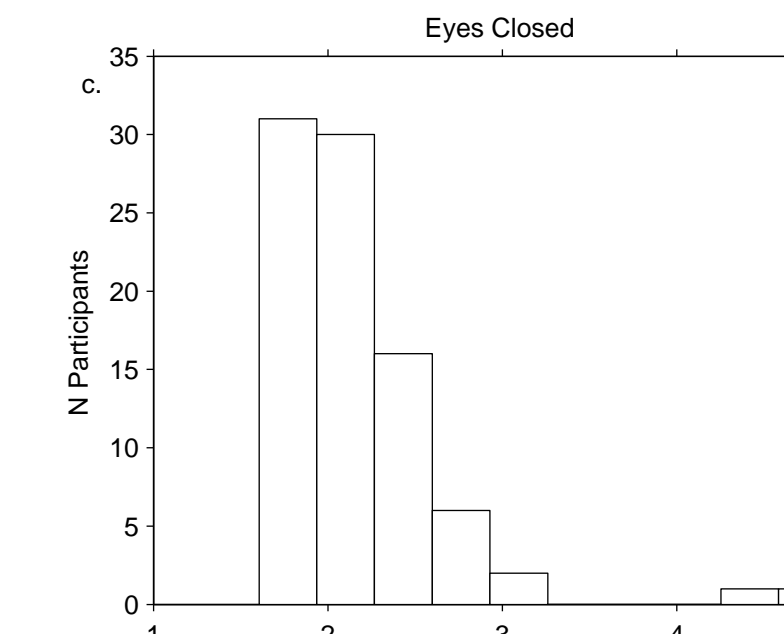

Supplement: EJN-48-2585-s006.pdf [file EJN-48-2585-s006.pdf]
